# Supplementary material for: A Biological Study of Anisotropic Silver Nanoparticles and Their Antimicrobial Application for Topical Use
Source: MDPI journal article supplement (doi:10.3390/vetsci8090177), 2021-08-31
Supplement: s1 [file s1]

## Supplementary data

Table S1

Inhibition zone diameter of AgNP gel (S1–S3) and povidone iodine (PI) against two species of human pathogens and animal pathogen (five isolates of *S. pseudintermedius*).

| Bacteria                        | Inhibition zone diameter (mm) <sup>a</sup> |              |              |                |
|---------------------------------|--------------------------------------------|--------------|--------------|----------------|
|                                 | S1                                         | S2           | S3           | PI             |
| <i>E. coli</i> O157/H7          | 14.00 ± 2.83                               | 11.50 ± 0.71 | 9.00 ± 0.00  | 12.00 ± 0.00   |
| <i>S. aureus</i> ATCC 25923     | 14.00 ± 0.00                               | 13.00 ± 0.00 | 12.00 ± 0.00 | 22.50 ± 4.95   |
| <i>P. aeruginosa</i> ATCC 27853 | 13.50 ± 0.71                               | 12.00 ± 0.00 | 11.00 ± 0.00 | 22.50 ± 0.71   |
| * MIC407                        | 10.75 ± 1.06                               | 10.00 ± 0.00 | 8.25 ± 1.06  | 12.88 ± 1.24   |
| * MIC408                        | 11.50 ± 0.71                               | 9.25 ± 1.06  | 9.88 ± 0.18  | 13.00 ± 0.00   |
| * MIC411                        | 9.50 ± 0.71                                | 8.75 ± 0.71  | 7.63 ± 0.53  | 12.50 ± 0.71   |
| MIC504                          | 8.12 ± 0.88                                | 9.00 ± 0.00  | 8.50 ± 0.71  | 13.50 ± 0.71   |
| MIC509                          | 9.25 ± 1.06                                | 10.62 ± 1.24 | 8.00 ± 0.00  | 14.00 ± 0.00   |
| Average                         | 11.46 ± 0.99                               | 10.85 ± 0.46 | 9.53±0.31    | 15.36 ± 1.04** |

<sup>a</sup>Mean value ± SD, the mean of the triplicate samples. Asterisk (\*\*) denotes a statistically significant difference compared with other groups ( $p < 0.05$ ). The inhibition zone includes the diameter of the well (6 mm). The five isolates of *S. pseudintermedius* are MIC 407, 408, 411, 504 and 509.

\* Methicillin-resistant *Staphylococcus pseudintermedius* (MRSP)

Table S2

Comparison of the inhibition zone diameter of AgNP gel (S1–S3) with povidone iodine (PI) after the antimicrobial agents were incubated with bacteria for 48 h.

| Agents | Inhibition zone (mm) <sup>a</sup> |              |                                 |              |
|--------|-----------------------------------|--------------|---------------------------------|--------------|
|        | <i>S. aureus</i> ATCC 25923       |              | <i>P. aeruginosa</i> ATCC 27853 |              |
|        | 24 h                              | 48 h         | 24 h                            | 48 h         |
| S1     | 14.00 ± 0.00                      | 14.00 ± 0.00 | 15.25 ± 0.35                    | 15.25 ± 0.35 |
| S2     | 14.25 ± 1.77                      | 14.25 ± 1.77 | 14.63 ± 1.11                    | 14.63 ± 1.11 |
| S3     | 11.50 ± 0.71                      | 11.50 ± 0.71 | 12.83 ± 1.03                    | 12.83 ± 1.03 |
| PI     | 22.50 ± 4.95                      | 17.00 ± 2.65 | 22.50 ± 0.71                    | 15.00 ± 0.00 |

<sup>a</sup>Mean value ± SD, the mean of the triplicate samples. The inhibition zone includes the diameter of the well (6 mm).

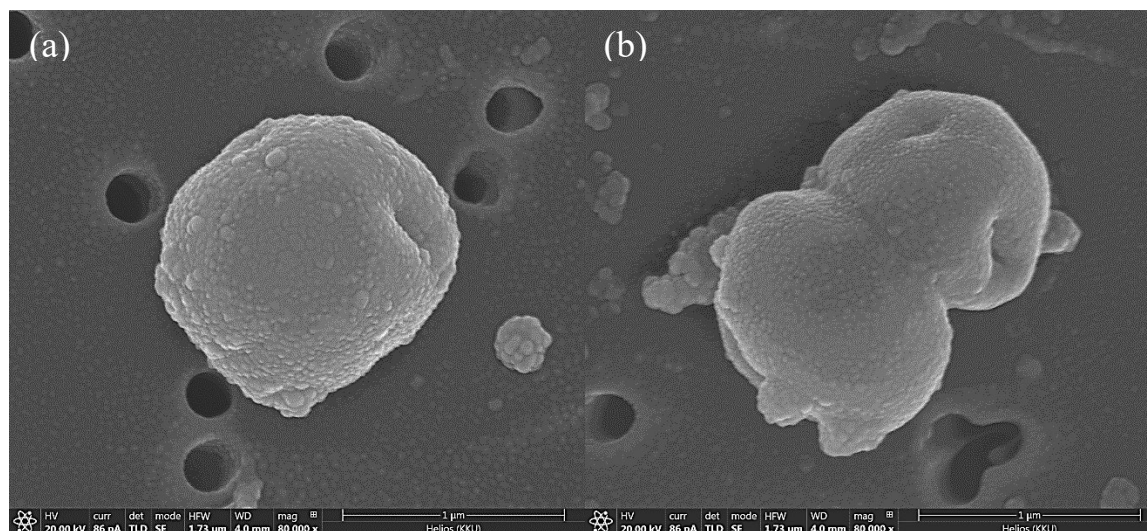

Figure S1 Cell morphological change of *S. pseudintermedius* MIC 411 observed by FIB-FESEM. The bacterial cells were treated at concentration of MBC level for 1.5 h with AgNSs (a), and anisotropic AgNPs (b). Bacterial cell treated AgNPs show the distorted cell and membrane damage with disintegration and pores.
